# Supplementary material
Source: PubMed Central journal article supplement (PMC4636980)
Supplement: NIHMS698791-supplement.pdf [file NIHMS698791-supplement.pdf]

## Reward Anticipation Is Encoded Differently by Adolescent Ventral Tegmental Area Neurons

### Supplemental Information

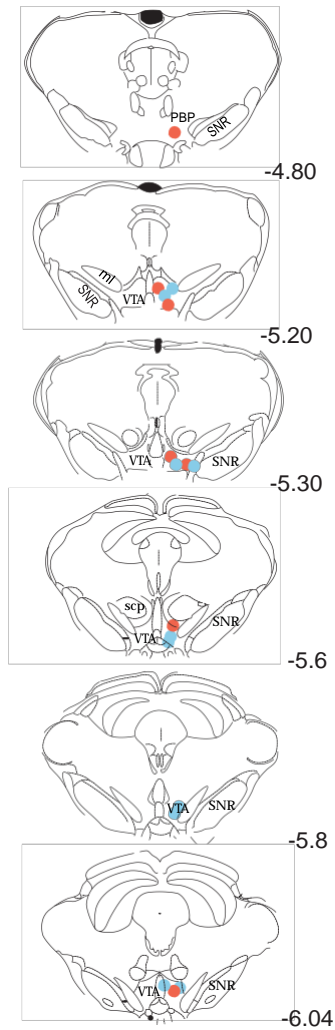

**Figure S1.** Electrode placements within VTA. Coronal sections of rodent brains are depicted with estimated microelectrode array locations. Orange and blue indicate adolescents and adults, respectively.
